# Supplementary material
Source: Copernicus journal article supplement (doi:10.5194/ejm-38-337-2026)
Supplement: Supplementary file [file ejm-38-337-2026-supplement-title-page.pdf › ejm-38-337-2026-supplement-title-page.pdf]

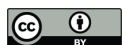

*Supplement of*

**Piilonenite-(Nd),  $\text{NaNd}(\text{CO}_3)_2 \cdot 3\text{H}_2\text{O}$ , a new neodymium-dominant carbonate mineral from Mont Saint-Hilaire, Quebec, Canada**

**Inna Lykova et al.**

*Correspondence to:* Inna Lykova (ilykova@nature.ca)

- ejm-38-337-2026-supplement-title-page.pdf
- Piilonenite-(Nd).cif
- X-25-0098(23\_369)(Lykova)20-000-0000\_exported.xy

The copyright of individual parts of the supplement might differ from the article licence.
